# Supplementary material for: Bright green luminescent molecular terbium plastic materials derived from 3,5-bis(perfluorobenzyloxy)benzoate
Source: Royal Society of Chemistry journal article supplement (doi:10.1039/c2jm30535f), 2012-01-01
Supplement: c2jm30535f.pdf [file c2jm30535f.pdf]

# Supporting Information

**Bright green luminescent molecular terbium plastic materials derived  
from 3,5-bis(perfluorobenzyloxy)benzoate**

**Sarika Sivakumar and M. L. P. Reddy\***

*Chemical Sciences and Technology Division, National Institute for Interdisciplinary  
Science & Technology (NIIST), CSIR, Thiruvananthapuram-695 019, India*

E-mail: [mlpreddy55@gmail.com](mailto:mlpreddy55@gmail.com)



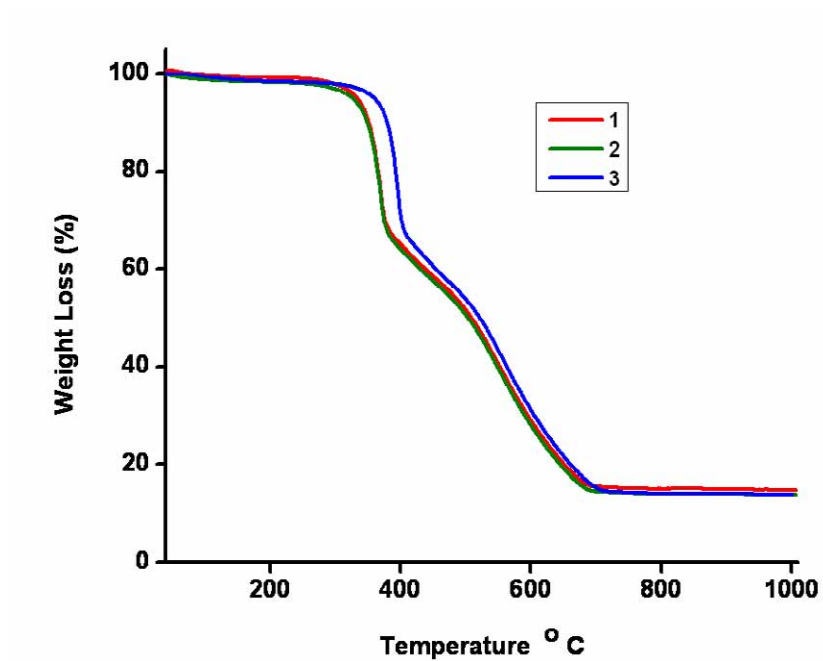

Fig. S3 Thermogravimetric plots for complexes 1-3.

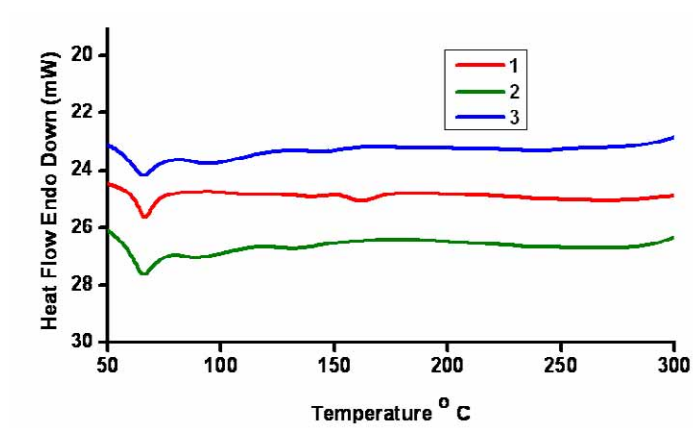

Fig. S4 DSC curve for the complexes 1-3.

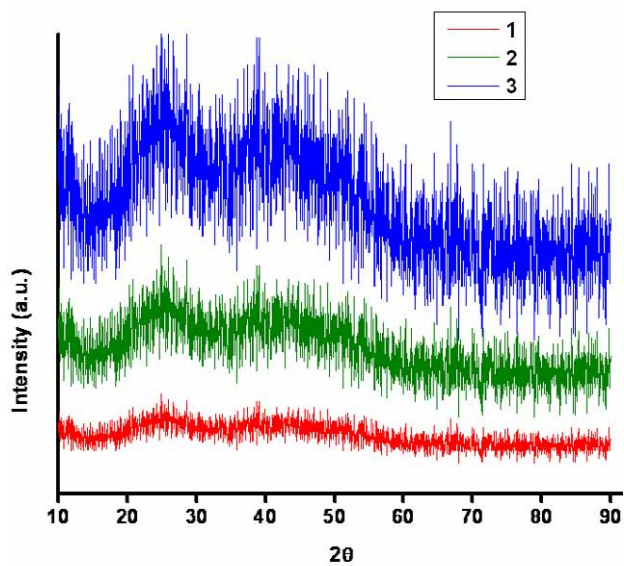

**Fig. S5** Powder XRD patterns for complexes **1-3**.

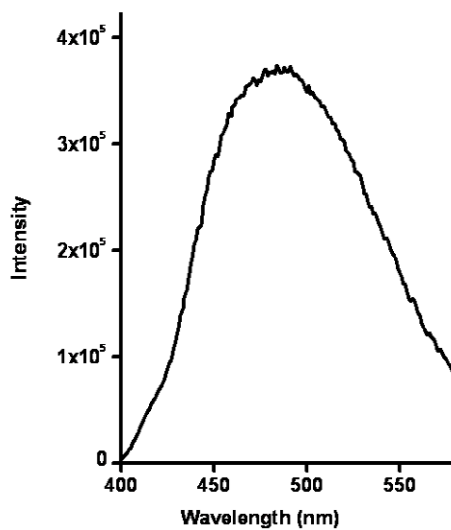

**Fig. S6** Phosphorescence spectrum of gadolinium complex **3** at 77 K.

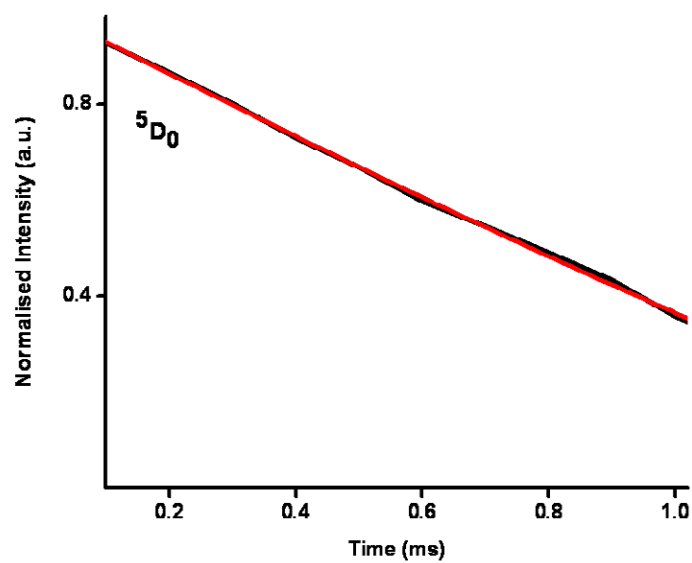

**Fig. S7** Low-temperature luminescence decay profile for complex 1 excited at 300 nm monitored at  $\sim 612$  nm.

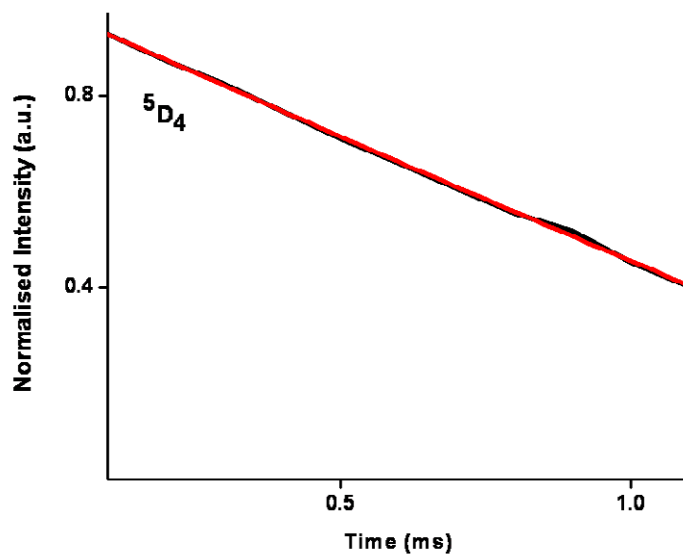

**Fig. S8** Low-temperature luminescence decay profile for complex 2 excited at 340 nm monitored at  $\sim 545$  nm.

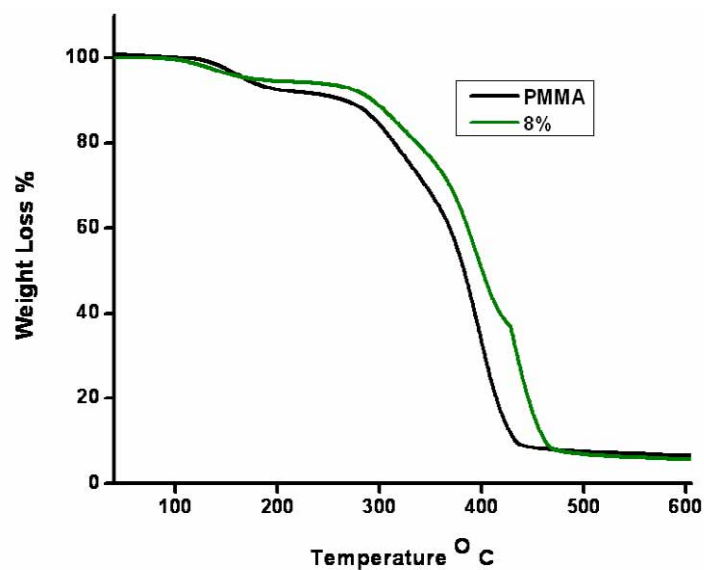

Fig. S9 Thermogravimetric curves for PMMA and 8% Tb<sup>3+</sup> doped polymer film.

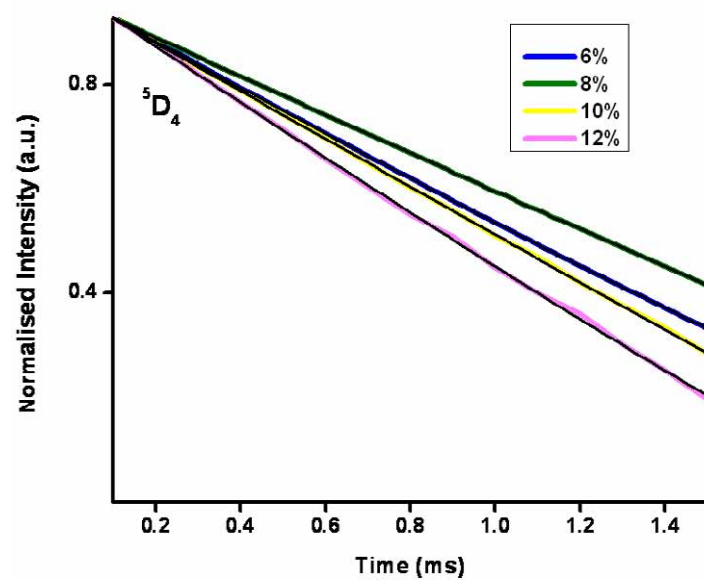

Fig. S10 Luminescence decay profiles for doped polymer films excited at 320 nm, and monitored at ~ 545 nm.

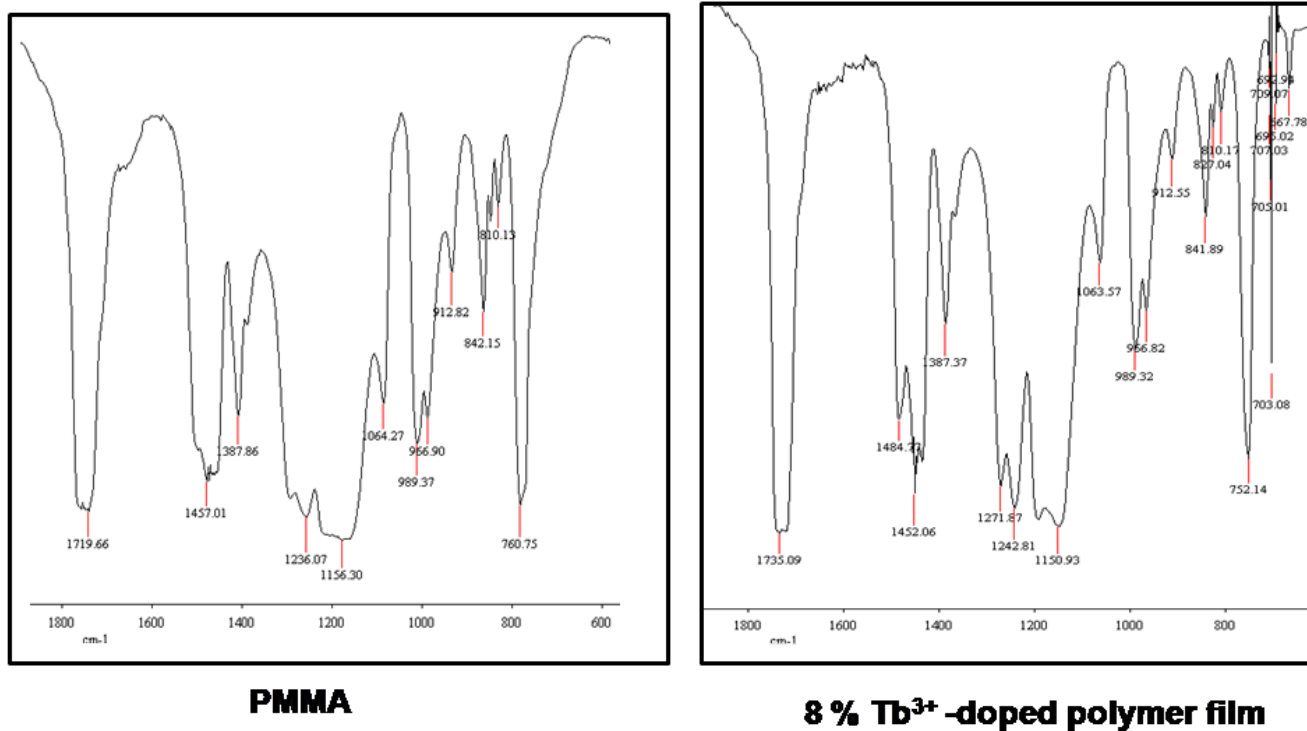

Fig. S11 FT-IR spectra for PMMA and doped polymer films.
